# Supplementary material for: Multifocal gastric adenocarcinoma in a patient with LRBA deficiency
Source: PubMed Central journal article supplement (PMC5516372; doi:10.1186/s13023-017-0682-5), 2017-07-18

**a.**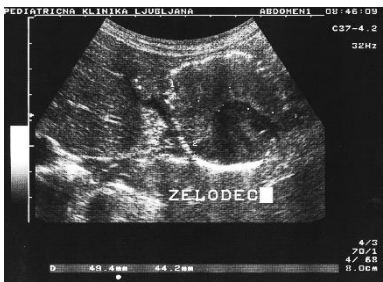**b.**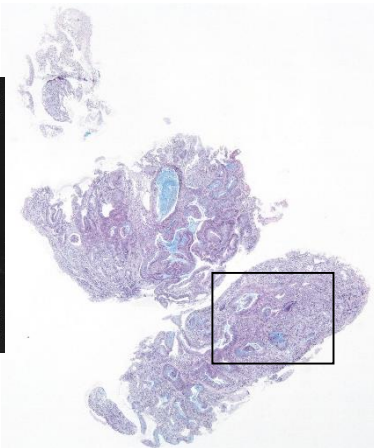**c.**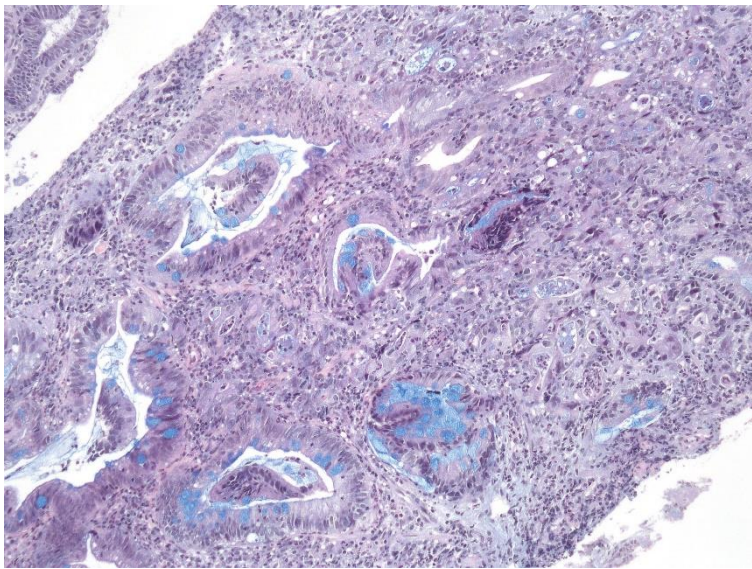

Supplement: 13023_2017_682_MOESM5_ESM.pdf [file 13023_2017_682_MOESM5_ESM.pdf]
